# Supplementary material
Source: MDPI journal article supplement (https://www.mdpi.com/2073-4344/7/7/198)
Supplement: s1 [file s1]

# Supplementary Materials: Ordered PtSn/C Electrocatalyst: A High Performance Material for the Borohydride Electrooxidation Reaction

Francielle Bortoloti and Antonio Ângelo

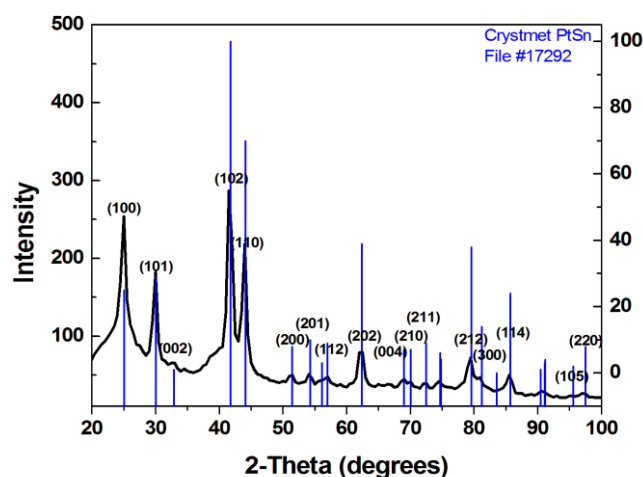

**Figure S1.** X-Ray diffractogram of the ordered intermetallic PtSn/C. The black profile refers to the recorded curve; the blue lines correspond to data for the standard materials compiled in the Database Crystmet.

**Table S1:** Mean atomic ratio medium of the elements in the synthesized materials ordered intermetallic PtSn/C.

| Material | Nominal Atomic Ratio |    | Atomic Ratio EDX |
|----------|----------------------|----|------------------|
| PtSn/C   | Pt                   | Sn | 1.0:1.0          |
|          | 1                    | 1  |                  |

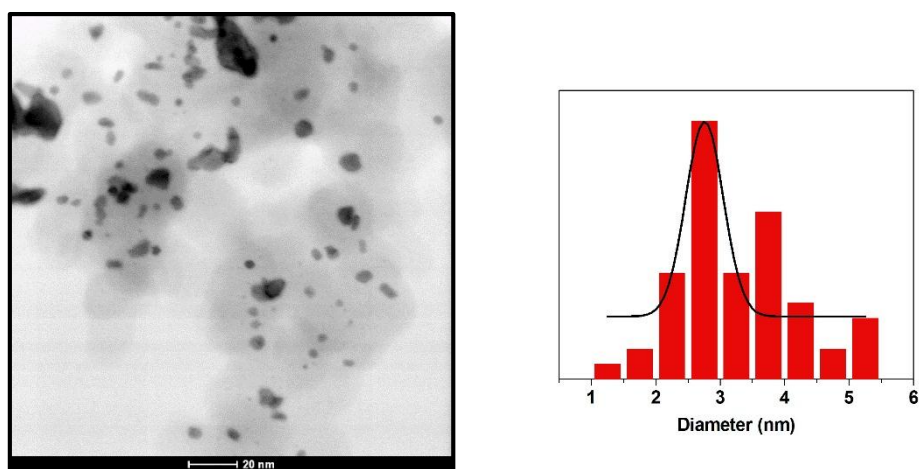

**Figure S2.** TEM and histogram for the average particle diameter of ordered intermetallic PtSn/C.
